# Supplementary material for: Sleep Disturbance and Subsequent Suicidal Behaviors in Preadolescence
Source: PubMed Central journal article supplement (PMC11406391; doi:10.1001/jamanetworkopen.2024.33734), 2024-09-16
Supplement: jamanetwopen-e2433734-s002.pdf [file jamanetwopen-e2433734-s002.pdf]

## Data Sharing Statement

Gowin. Sleep Disturbance and Subsequent Suicidal Behaviors in Preadolescence. *JAMA Netw Open*. Published September 16, 2024. doi:10.1001/jamanetworkopen.2024.33734

### Data

**Data available:** No

### Additional Information

**Explanation for why data not available:** The data are available through the ABCD study at NIH.
